# Supplementary material
Source: PubMed Central journal article supplement (PMC4269942)

**A**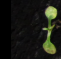

TueWa1-2/ICE163  
(Class 4)

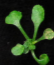

Uk-1/Uk-3  
(Class 3)

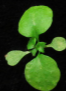

Bla-1/Hh-0  
(Class 2)

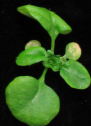

Dog-4/ICE163  
(Class 2)

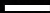**B**

Don-0/ICE29  
(Class 1)

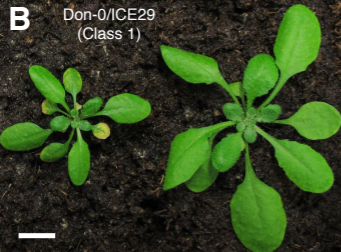**D**

TueWa1-2/ICE163  
(Class 4)

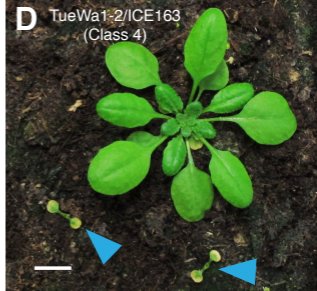**C**

Ey1.5-2/ICE228  
(Class 3)

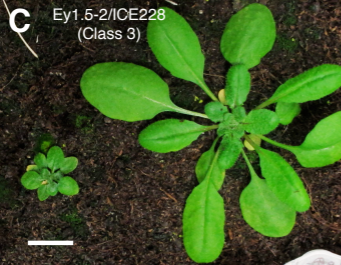**E**

Bak-2/ Cdm-0  
(Class 5)

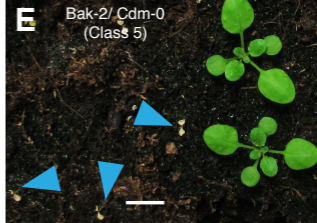

Supplement: NIHMS640359-supplement-1.pdf [file NIHMS640359-supplement-1.pdf]
