# Supplementary material
Source: PubMed Central journal article supplement (PMC4269942)

**A**

LRR 1 25

1 LEE L K L R N C S S L V E L P S I E K L T S -

2 L Q I L D L H C S S L V E L P \* S F G N A T K -

3 L E K L D L G N C S S L V L P P S I N A N N - -

4 L Q E L S L N C S R V V L P - A I E N A T N

5 L R E L K L G N C S S L I E L P S I G T A T N -

6 L K K L N I S G C S S L V K L P S I G D M T N -

7 L E V F D L S N C S \* L V L E P S I G N L Q K -

8 L X X L X M R G C S \* L E X L P I N I N L K S - -

9 L R T L D L T D C S \* Q L K S F P E I S T H I - - -

10 L R X L R L N N C N N L V S L P Q L P D S - - - -

11 L A Y I Y A D N C K S L E R L D C C F N N P E I S

cons. L X X L X L \* N C S S L V \* L P \* S I X (3-6)

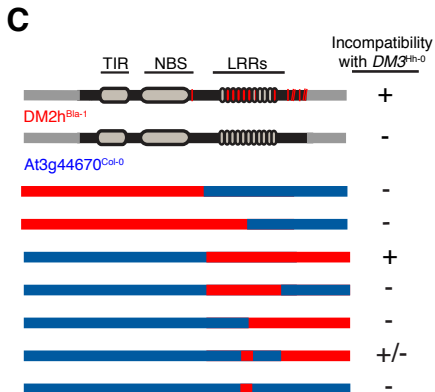

**B**

L Q R L Y L S C L E I L D L E N C L Q Q L S L I N C L R E L S L Q N C L D Y I Y A D N C

L Q R L Y L Q S C L E I L D L E N C L Q Q L S L I N C L R E L S L Q N C L D Y I Y A D N C

L Q R L Y L S C L E L L V L E N C L Q R L S L I N C L Q V L D L H N C L D Y I Y A D N C

L Q R L Y L Q S C L E E L V L E N C L Q Q L S L I N C L R E L S L Q N C L D Y I Y A D N C

L Q R L Y L Q S C L E E L V L E N C L Q Q L S L I N C L R E L S L Q N C L D Y I Y A D N C

L Q I L D L Q D C L K K L G L E N C L Q R L S L I N C L Q V L D L G N C L A Y I Y A D N C

L Q I L D L H S C L E N L D L G N C L R R K L S L I N C L Q R L D L G N C L Y Y I Y A D N C

L Q R L Y L Q S C L E I L D L E N C L Q Q L S L I N C L Q R L D L G N C L D Y I Y A D N C

L Q R L Y L Q S C L E I L D L E N C L Q Q L S L I N C L Q V L D L H N C L D Y I Y A D N C

L Q R L Y L Q S C L E I L D L E N C L Q Q L S L I N C L Q V L D L H N C L A Y I Y A D N C

L Q R L Y L Q S C L E E L V L E N C L Q Q L S L I N C L Q R L D L G N C L A Y I Y A D N C

L Q R L Y L Q S C L E E L V L E N C L Q Q L S L I N C L Q R L D L G N C L A Y I Y A D N C

L Q R L Y L Q S C L E E L V L E N C L Q Q L S L I N C L Q R L D L G N C L A Y I Y A D N C

L Q R L Y L Q S C L E E L V L E N C L Q Q L S L I N C L Q R L D L G N C L A Y I Y A D N C

2 3 4 5 11

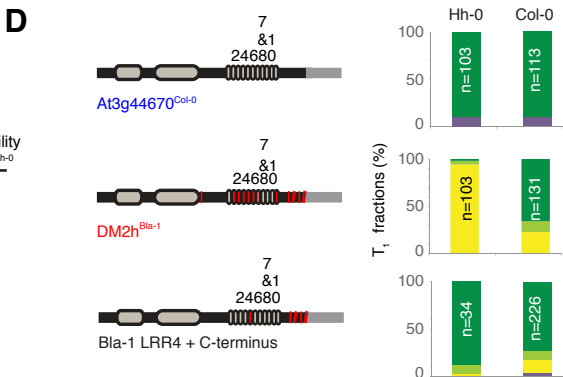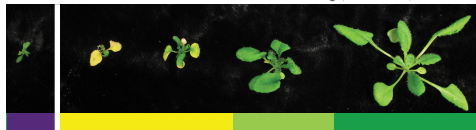

Supplement: NIHMS640359-supplement-5.pdf [file NIHMS640359-supplement-5.pdf]
