# Supplementary material
Source: PubMed Central journal article supplement (PMC4269942)

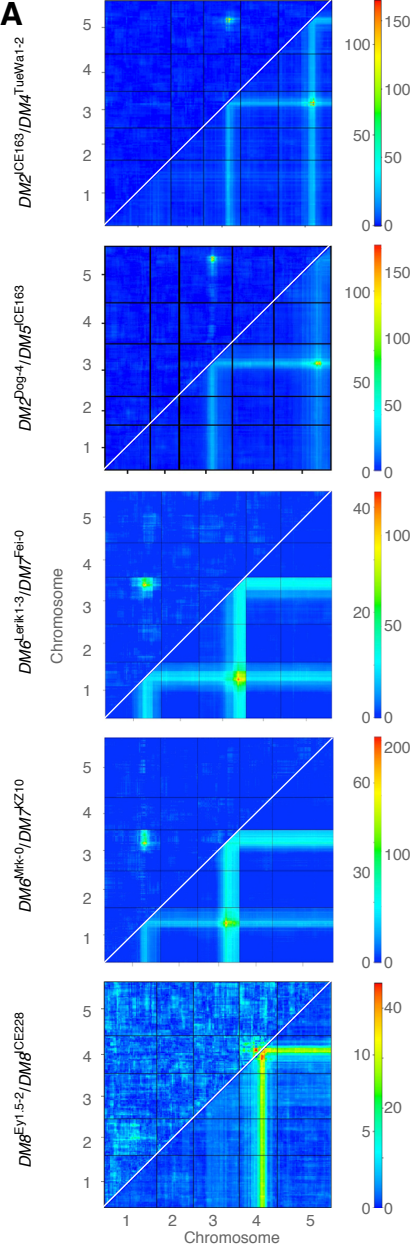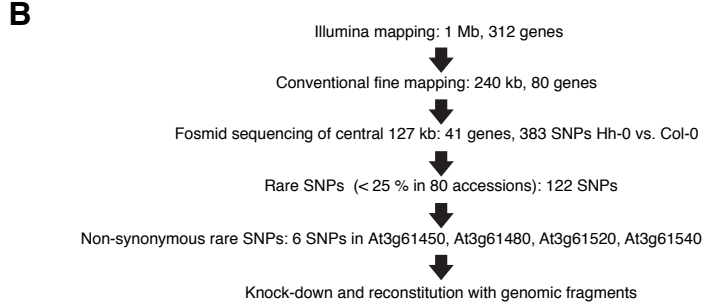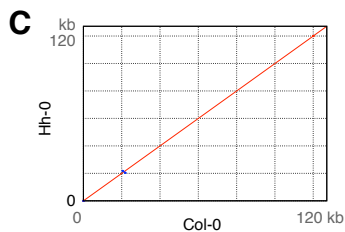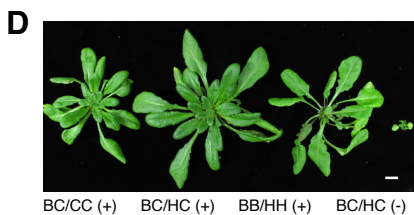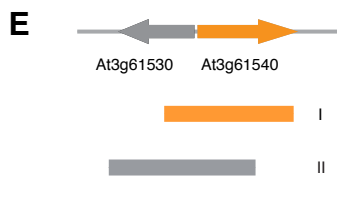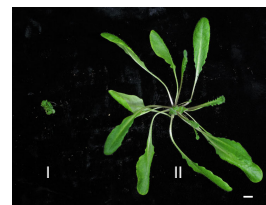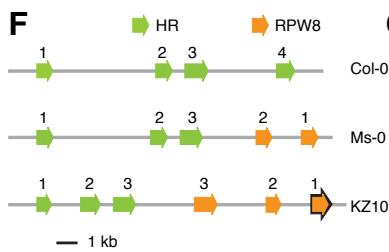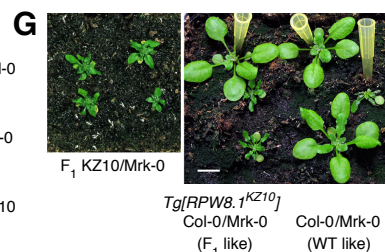

Supplement: NIHMS640359-supplement-2.pdf [file NIHMS640359-supplement-2.pdf]

■ MLS

\* 5' intron

○ TIR

○ NBS

●●●●●●●●●● LRRs

### Bla-1

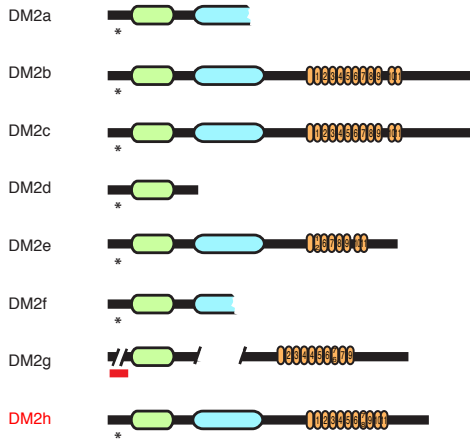

### Uk-1

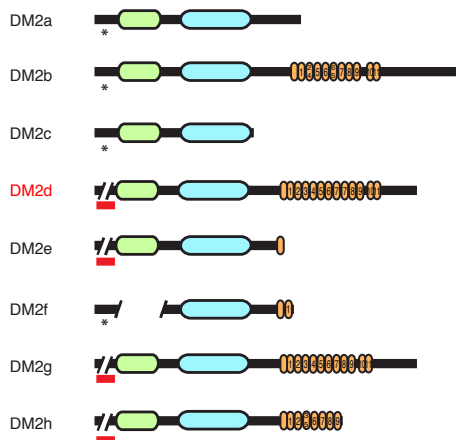

### Col-0

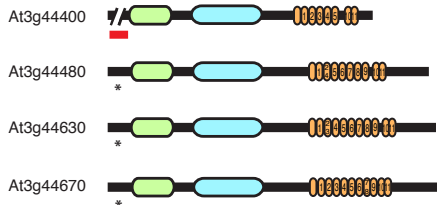

### *A. lyrata* MN47

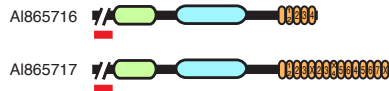

Supplement: NIHMS640359-supplement-3.pdf [file NIHMS640359-supplement-3.pdf]
